# Supplementary material for: Synthesis of hierarchical mesoporous vanadium silicate-1 zeolite catalysts for styrene epoxidation with organic hydroperoxide
Source: Royal Society of Chemistry journal article supplement (doi:10.1039/c3ta13451b), 2013-11-12

# Synthesis of Hierarchical Mesoporous Vanadium Silicate-1 Zeolite Catalysts for Styrene Epoxidation with Organic Hydroperoxide

Bhawan Singh, A. K. Sinha\*

Indian Institute of Petroleum – CSIR, Dehradun-248005, India, Fax: 91 135 2660202; Tel: 91  
135 2525842; E-mail: asinha@iip.res.in

**Supporting Figure 1:** Horvath-Kawazoe micropore size distribution of hierarchical mesoporous vanadium silicate-1 zeolite : (a) VS-1(0.5), (b) VS-1(1), (c) VS-1(2).

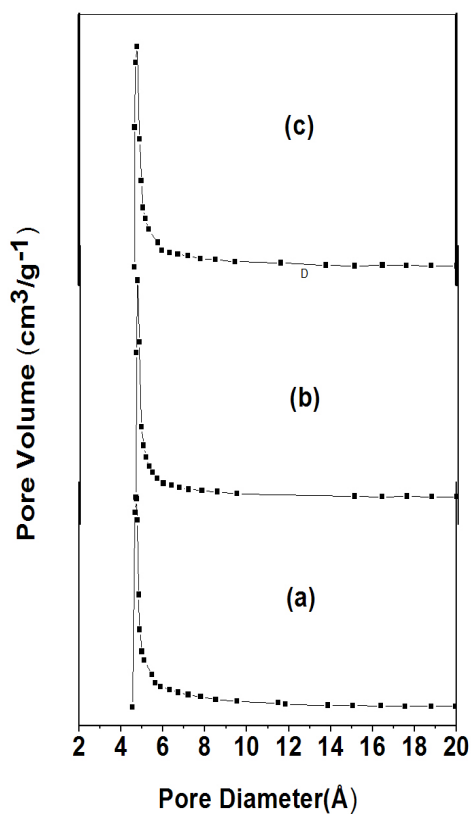

Supplement: c3ta13451b.pdf [file c3ta13451b.pdf]
